# Supplementary material
Source: PubMed Central journal article supplement (PMC3135958)

# Ethylene before curing - Rep 1

Sample 4

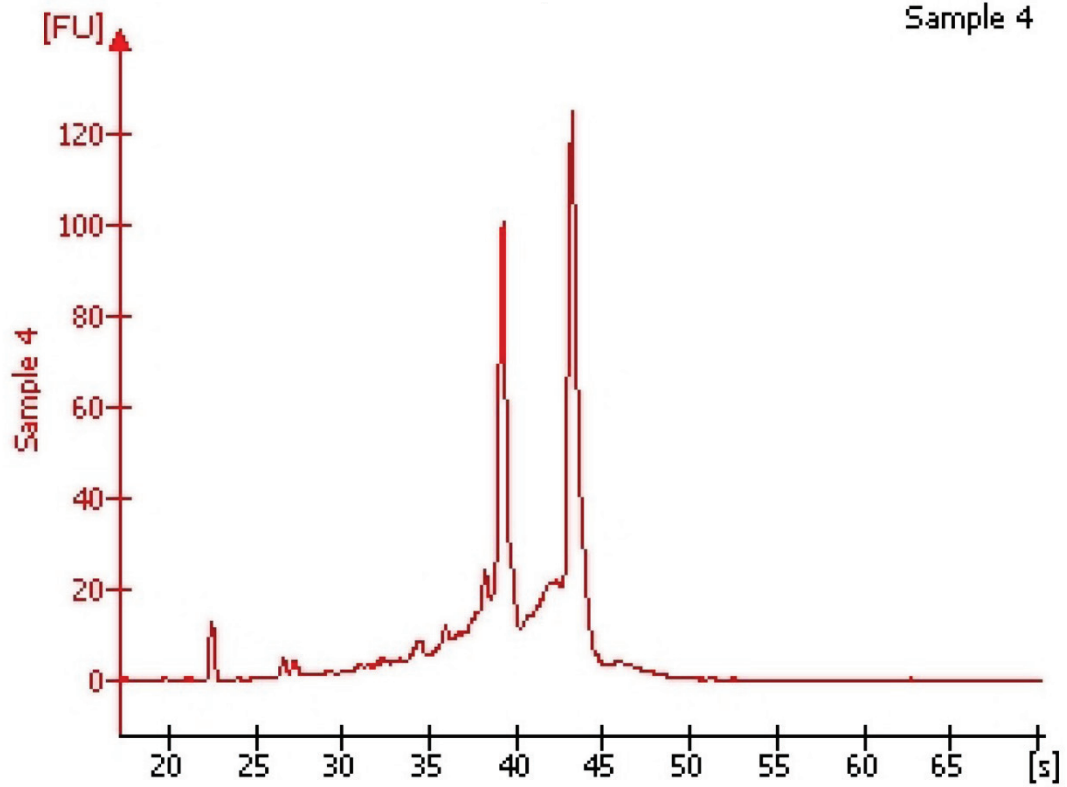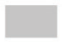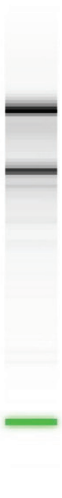

# Ethylene before curing - Rep 2

Sample 7

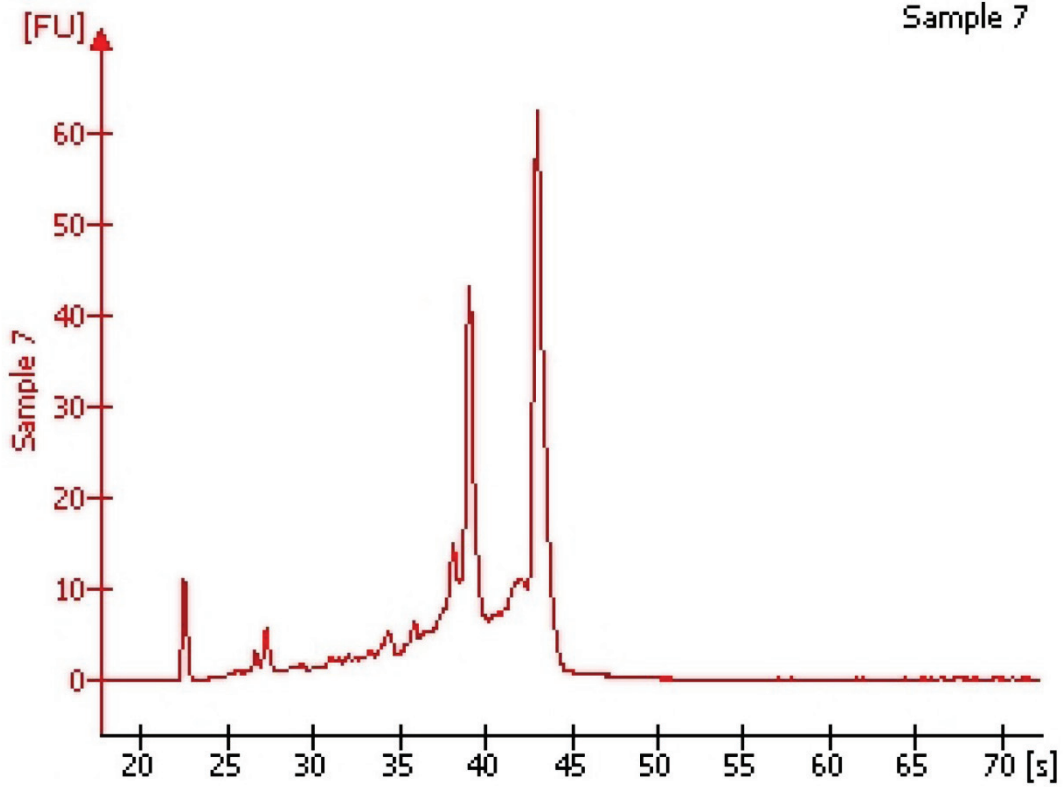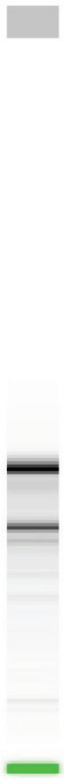

# Ethylene before curing - Rep 3

Sample 8

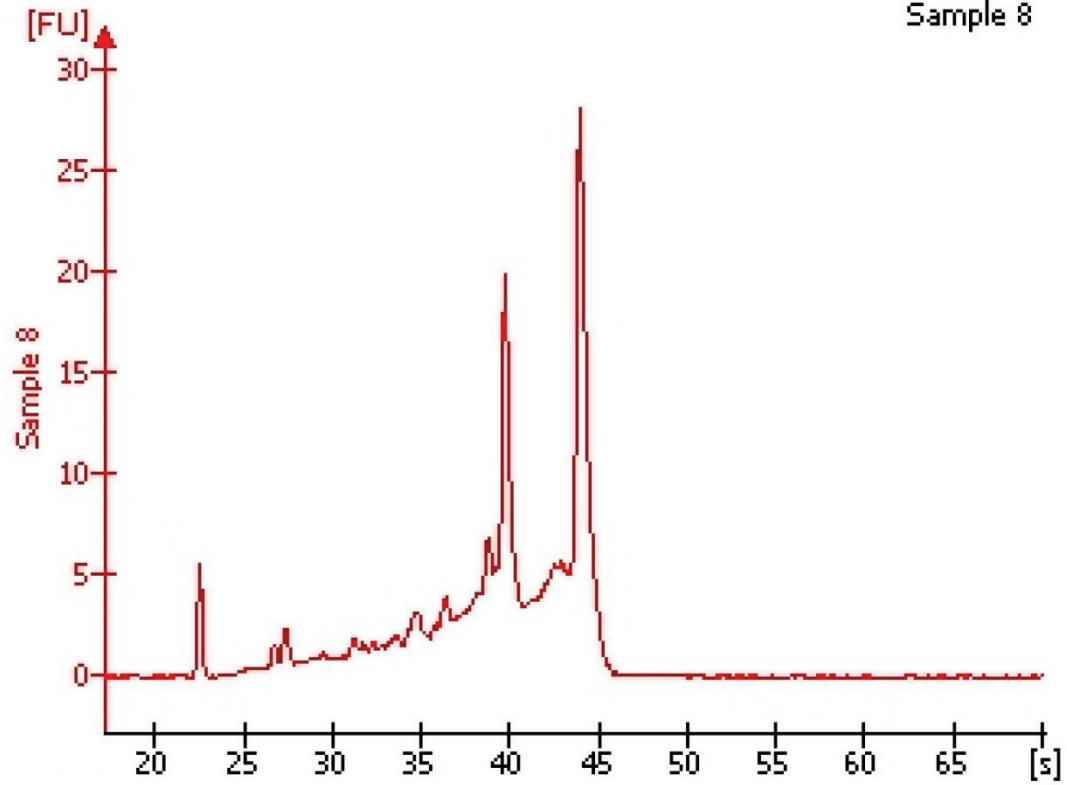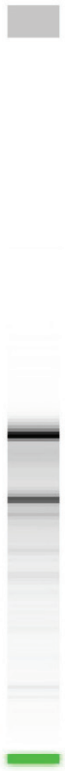

# Control - Rep 1

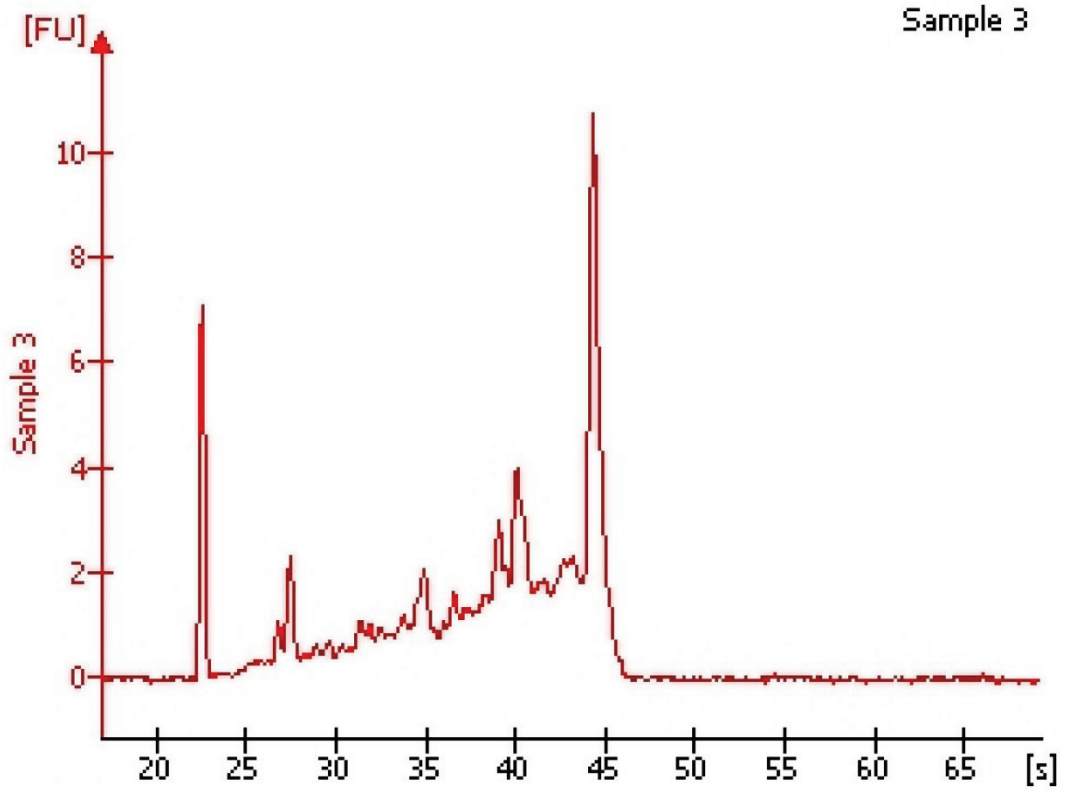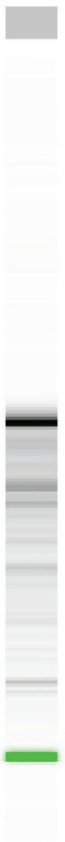

# Control - Rep 2

Sample 11

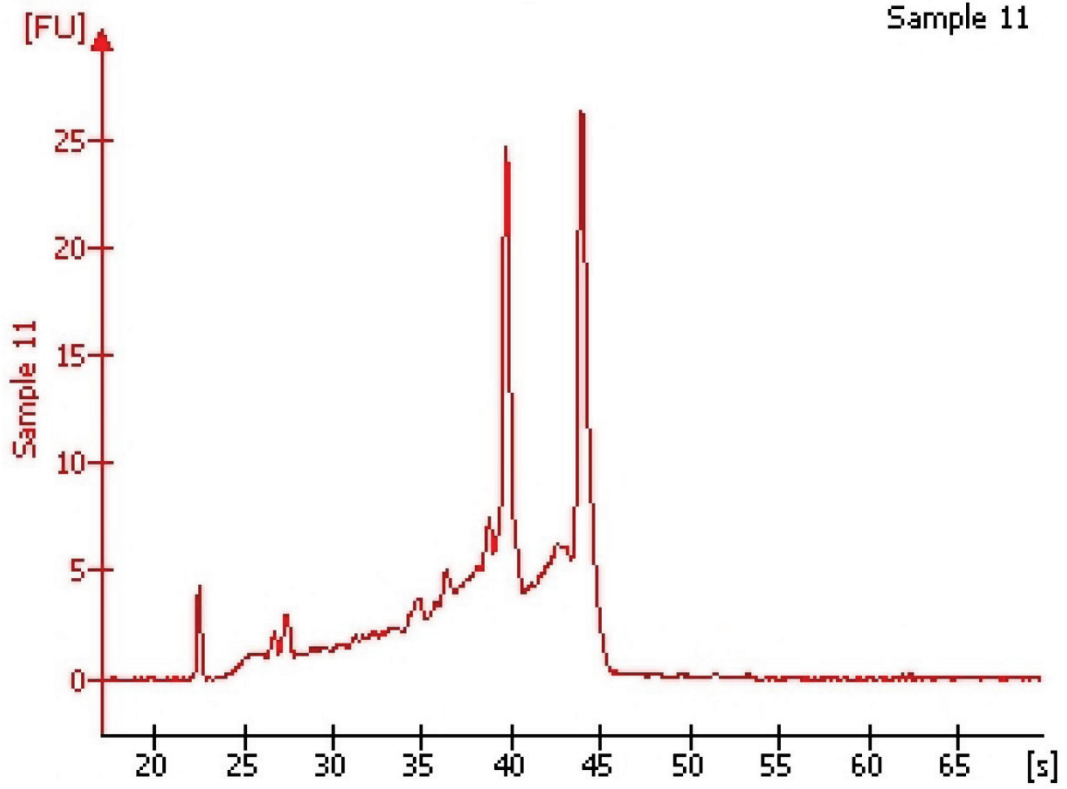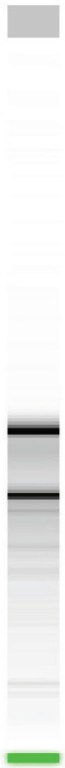

Control - Rep 3

Sample 11

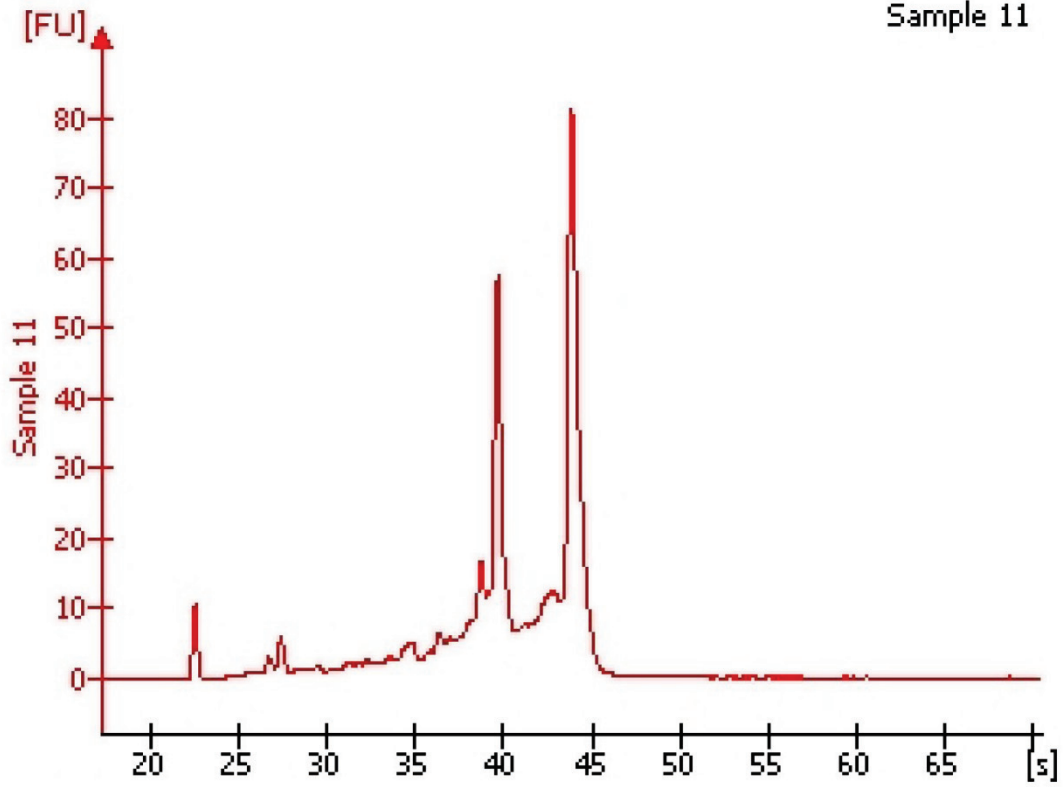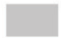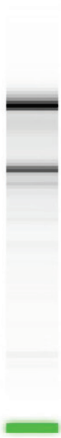

# 1-MCP before curing - Rep 1

Sample 9

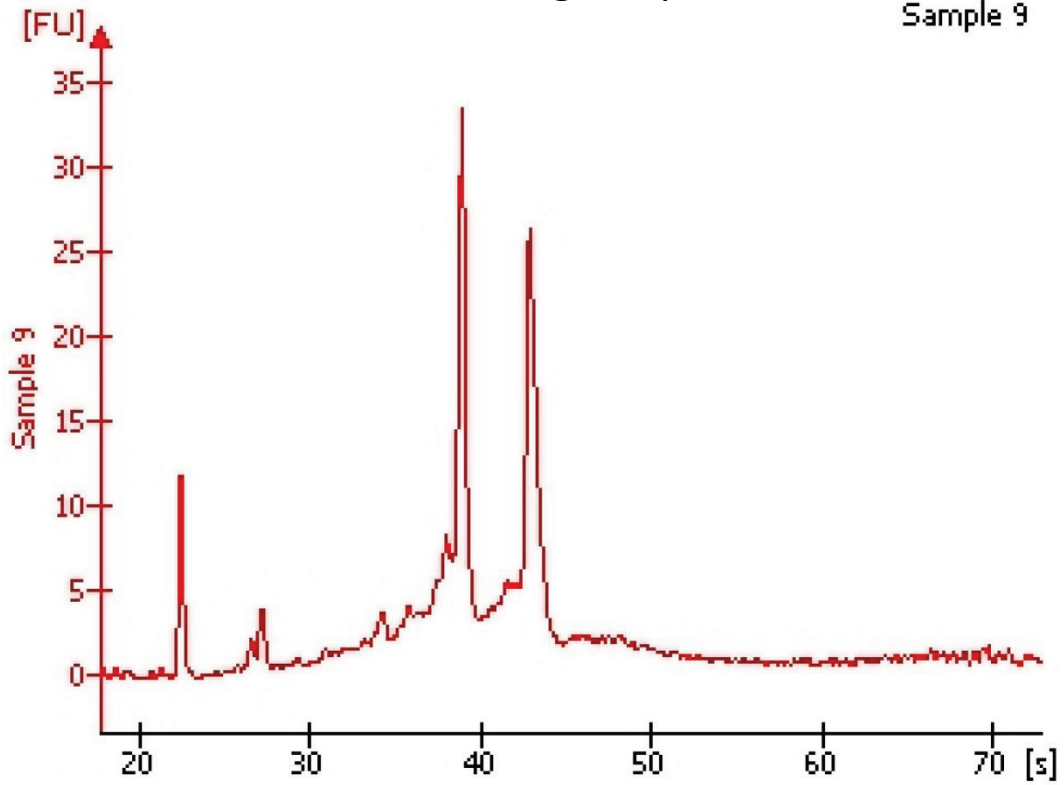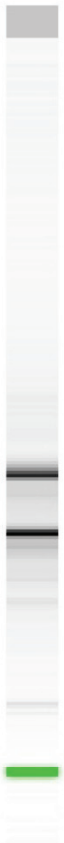

# 1-MCP before curing - Rep 2

Sample 12

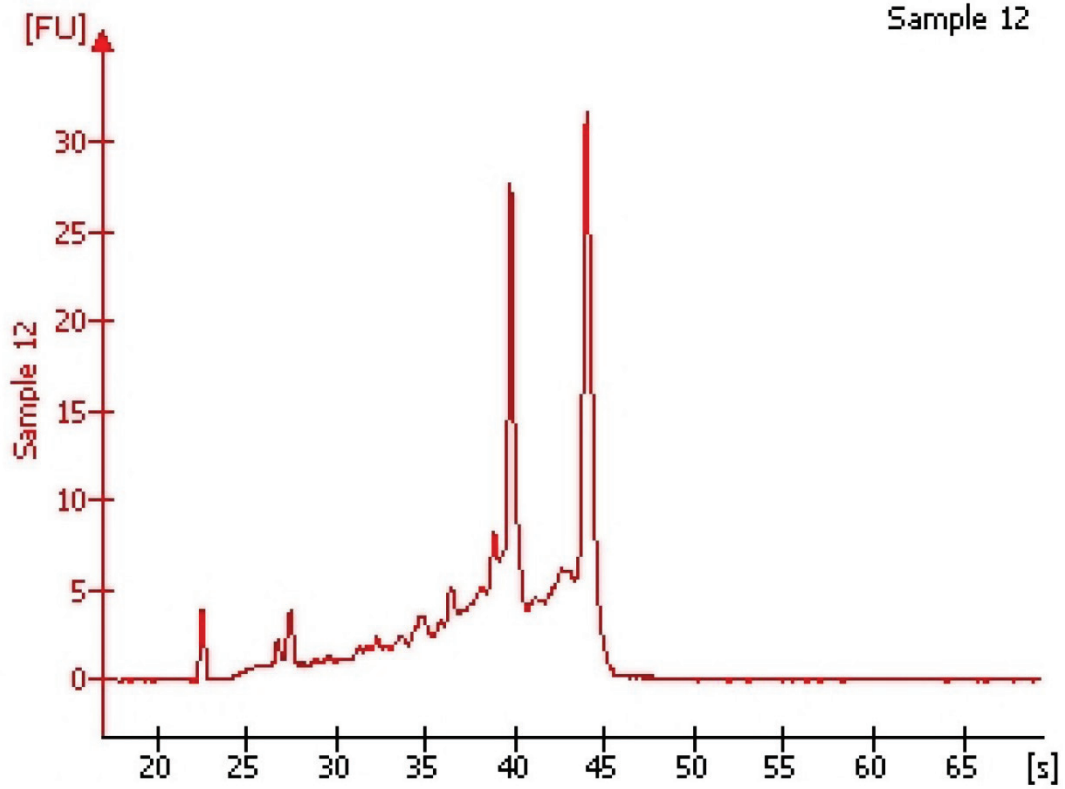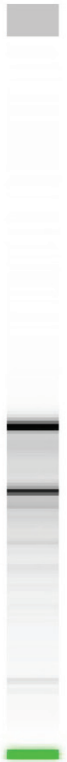



# 1-MCP before curing - Rep 3

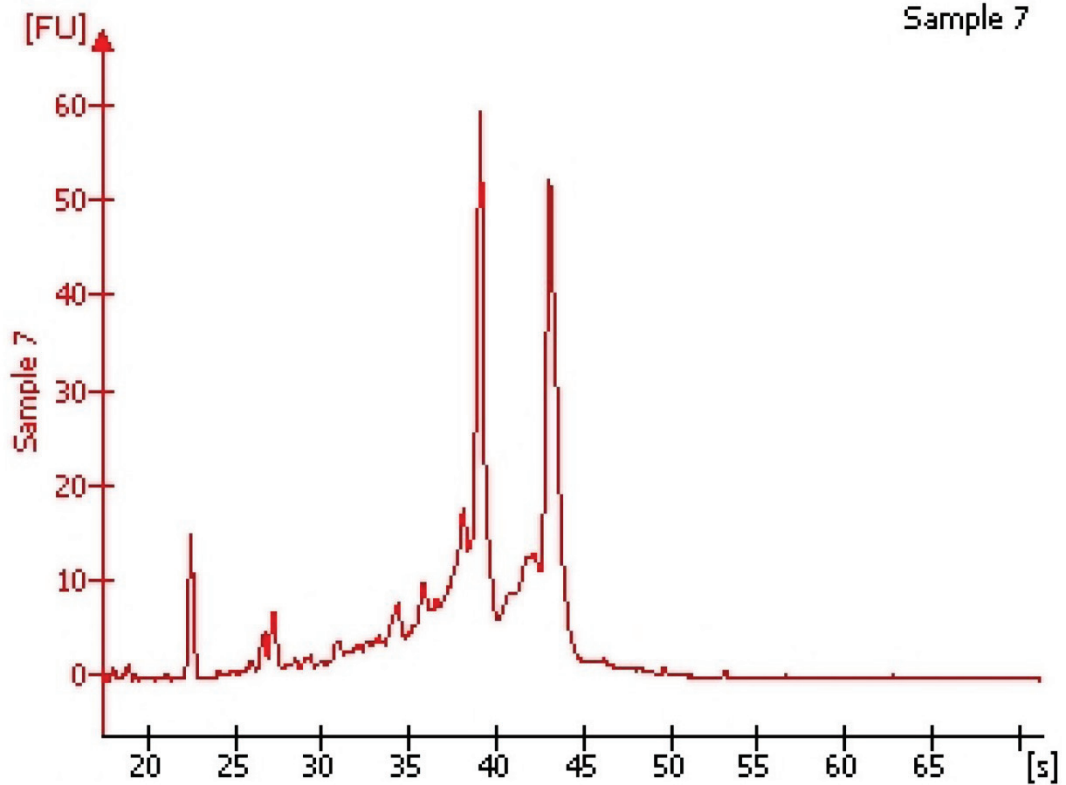

Sample 7

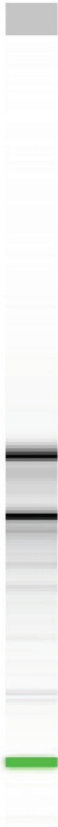

Ethylene and 1-MCP before curing  
- Rep 1

Sample 8

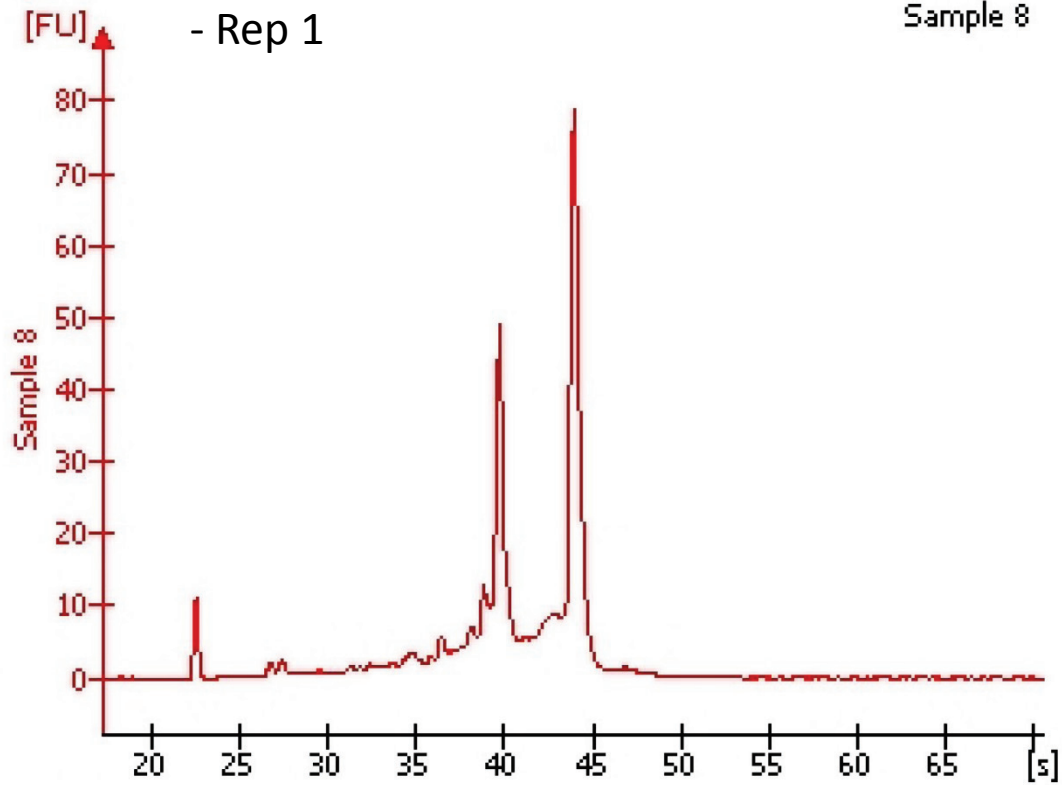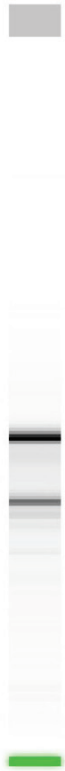

Ethylene and 1-MCP before curing  
- Rep 2

Sample 8

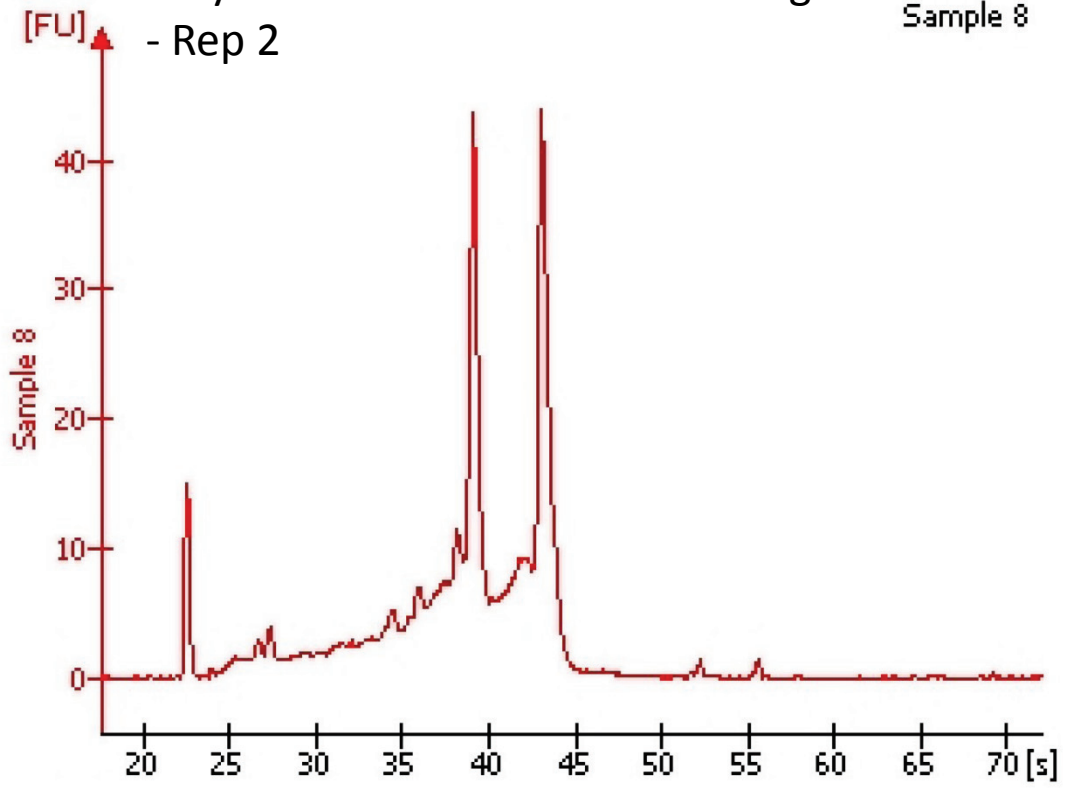

Ethylene and 1-MCP before curing  
- Rep 3

Sample 9

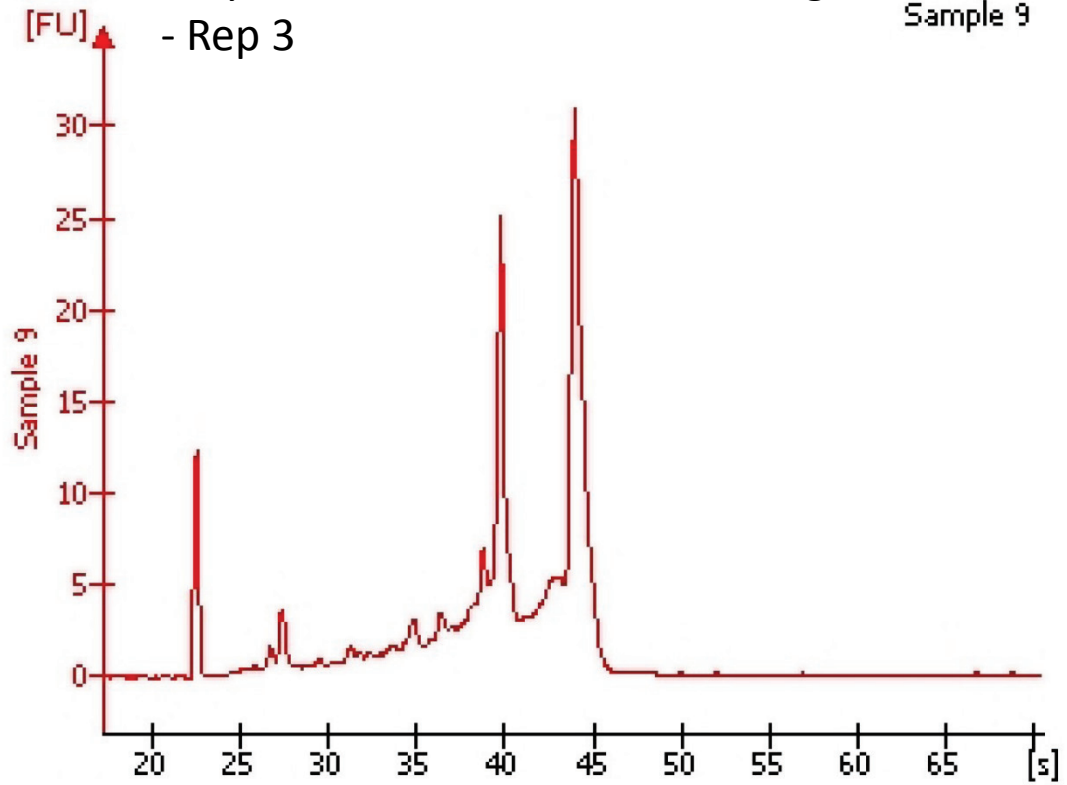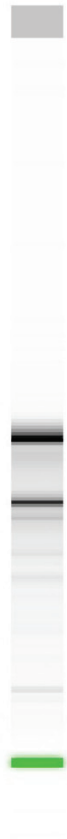

# Continuous air - Poland - Rep 1

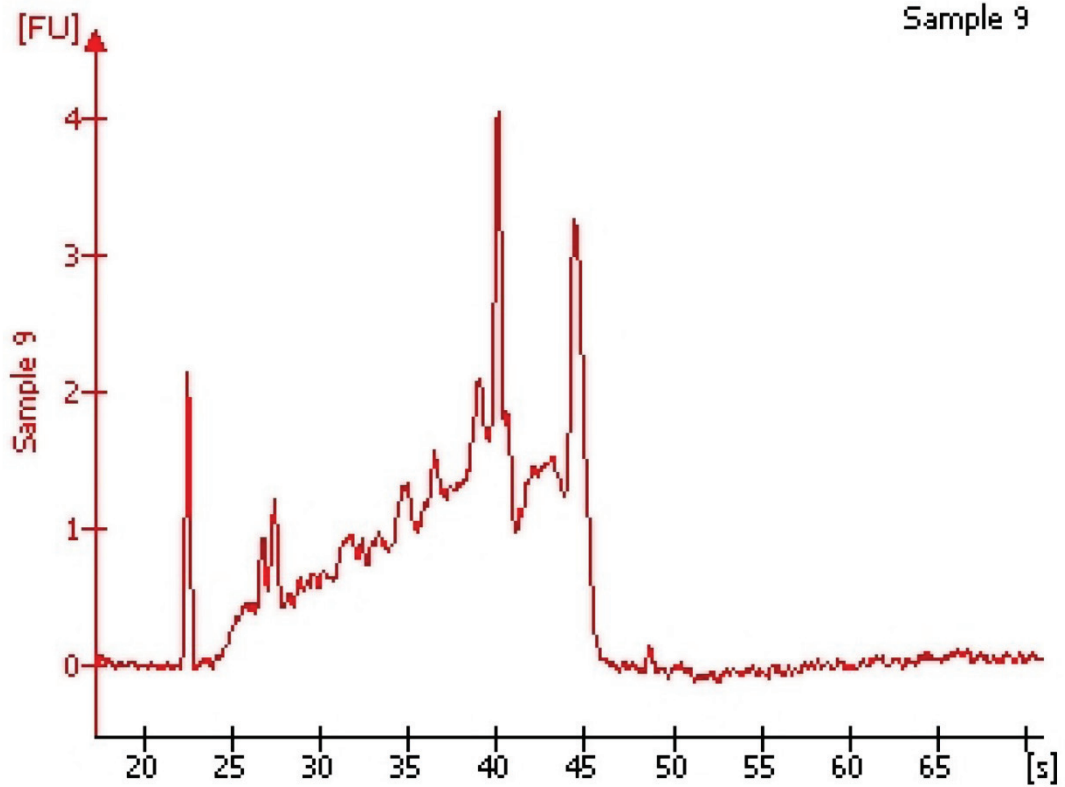

Sample 9

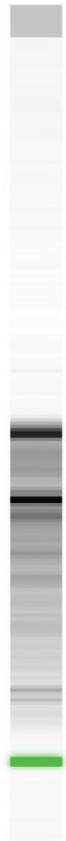

# Continuous air - Poland - Rep 2

Sample 2

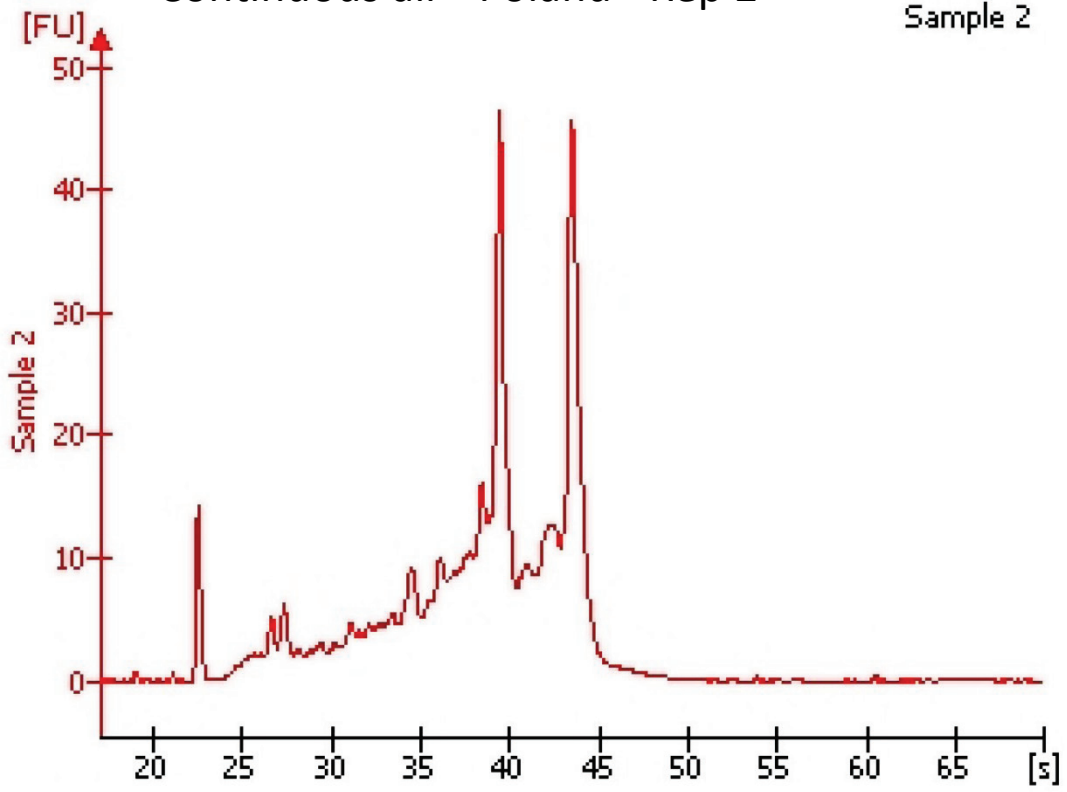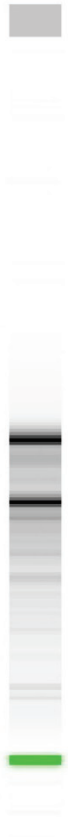

# Continuous air - Poland - Rep 3

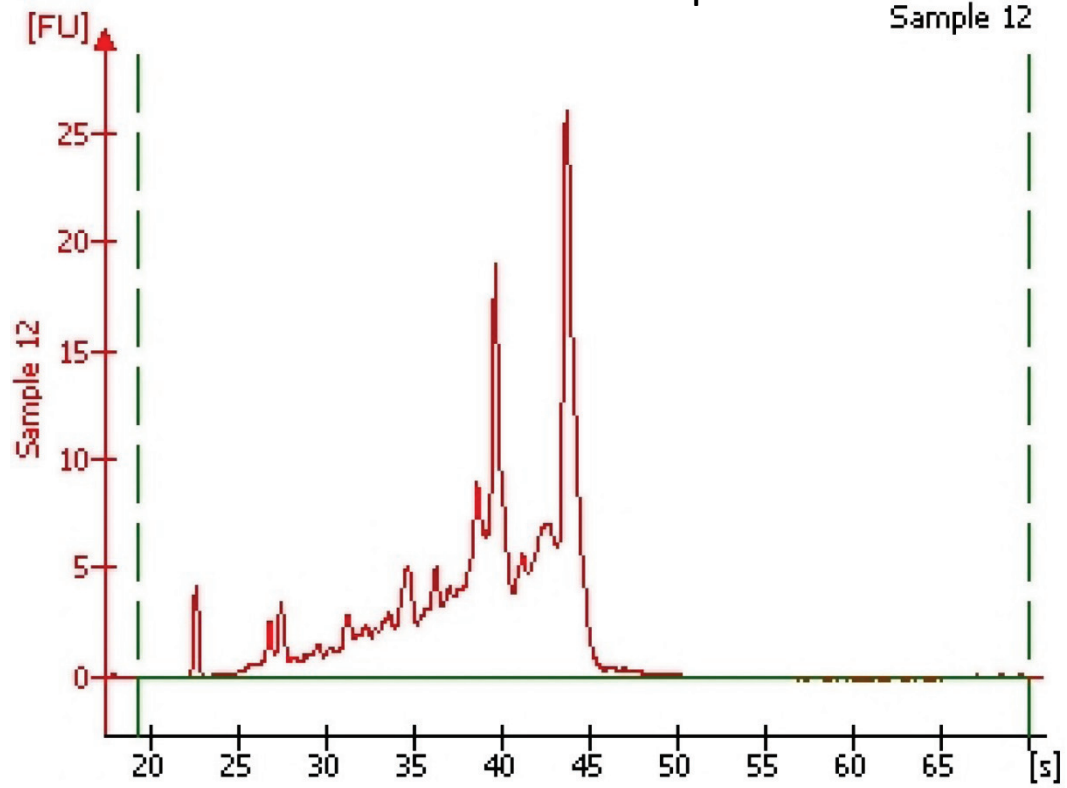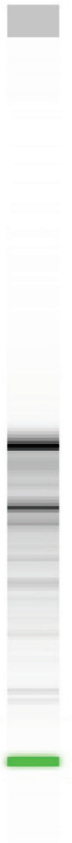

# Continuous ethylene - Poland - Rep 1

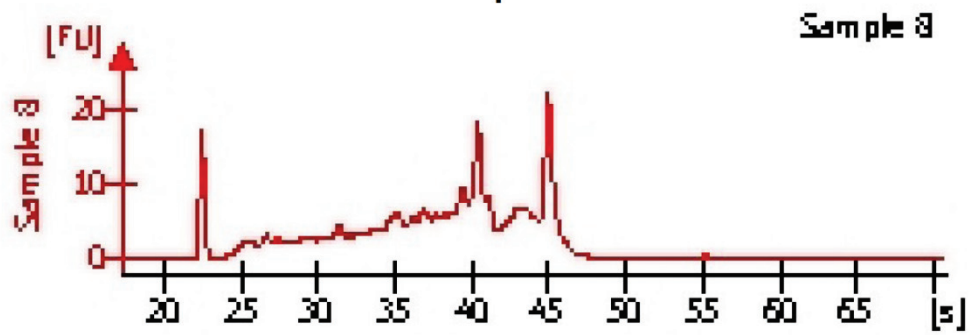



# Continuous ethylene - Poland - Rep 2

Sample 6

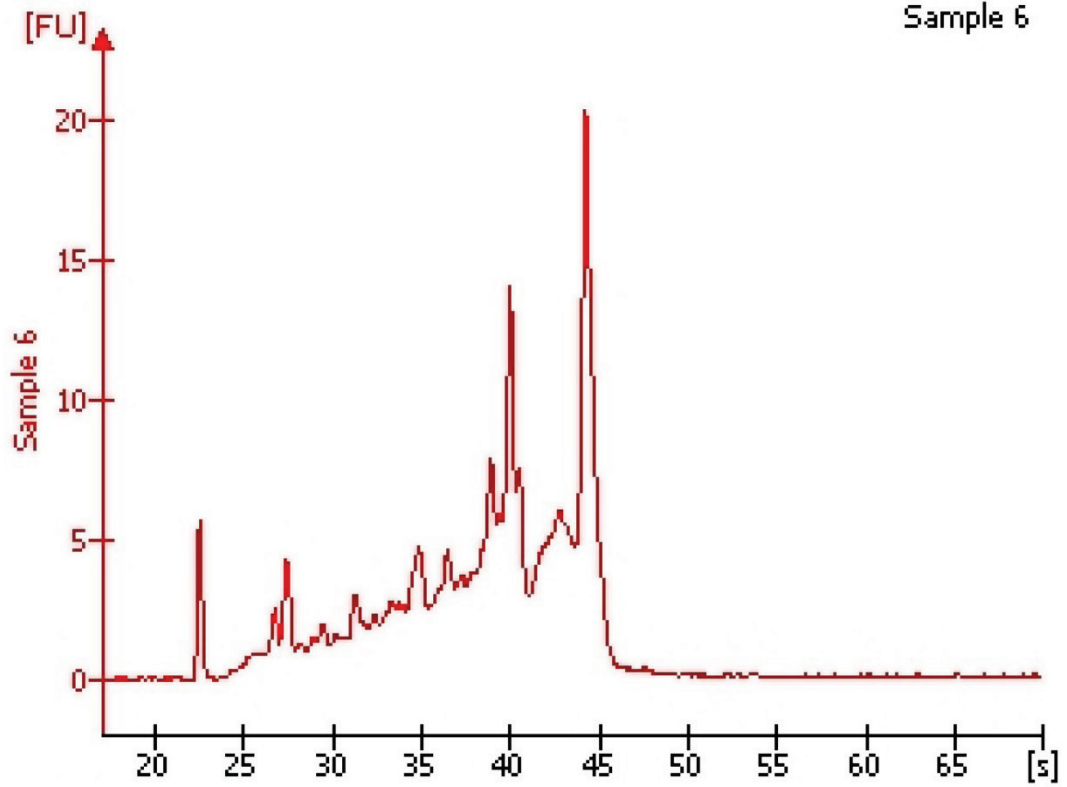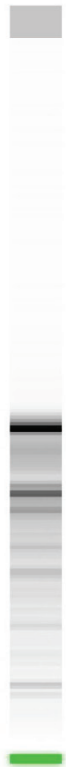

# Continuous ethylene - Poland - Rep 3

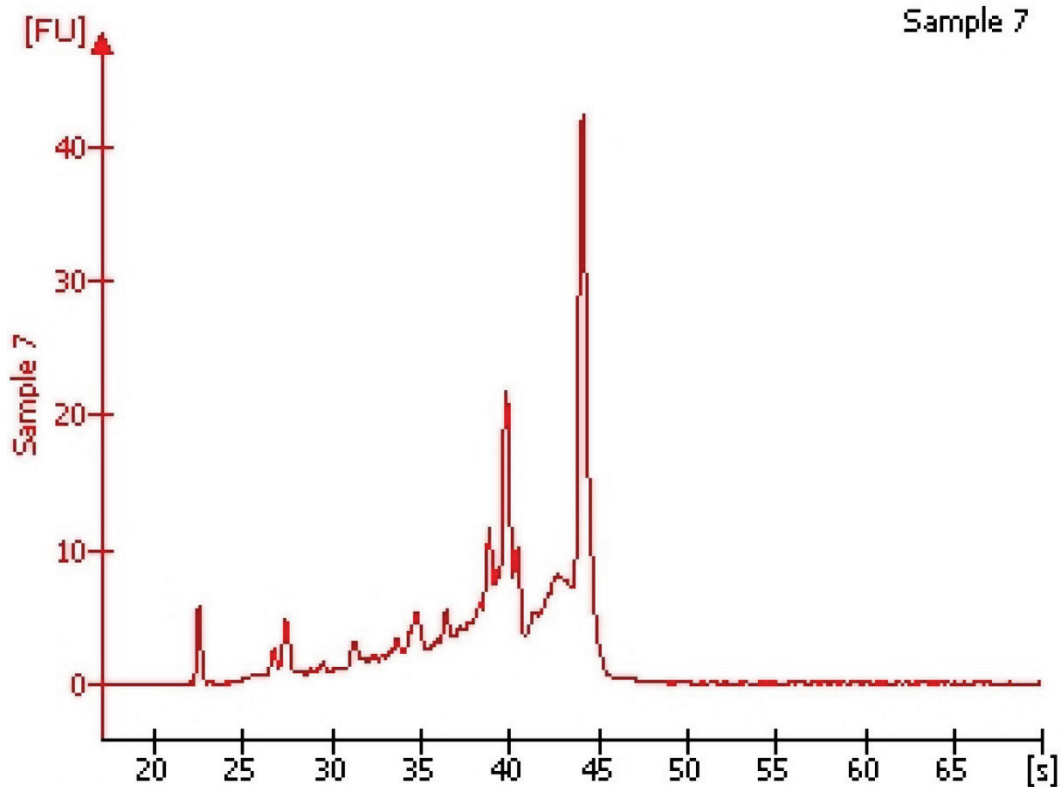

Sample 7

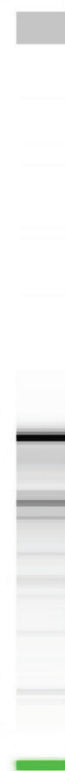

Supplement: supp_pp.111.174979_174979suppdata.pdf [file supp_pp.111.174979_174979suppdata.pdf]
